# Supplementary material for: Lipoxygenase Pathways in Diatoms: Occurrence and Correlation with Grazer Toxicity in Four Benthic Species
Source: PubMed Central journal article supplement (PMC7024367; doi:10.3390/md18010066), 2020-01-19
Supplement: marinedrugs-18-00066-s001.pdf [file marinedrugs-18-00066-s001.pdf]

# Supporting Information

## Lipoxygenase Pathways in Diatoms: Occurrence and Correlation with Grazer Toxicity in Four Benthic Species

**Nadia Ruocco,<sup>1,2</sup> Genoveffa Nuzzo,<sup>1</sup> Giuliana d'Ippolito,<sup>1</sup> Emiliano Manzo,<sup>1</sup> Angela Sardo,<sup>1</sup>**

**Adrianna Ianora,<sup>2</sup> Giovanna Romano,<sup>2</sup> Antonella Iuliano,<sup>3</sup> Valerio Zupo,<sup>2</sup> Maria Costantini,<sup>2</sup>**

**Angelo Fontana<sup>1\*</sup>**

<sup>1</sup> Consiglio Nazionale delle Ricerche, Istituto di Chimica Biomolecolare, Via Campi Flegrei 34, 80078, Pozzuoli, Napoli, Italy.

<sup>2</sup> Department of Marine Biotechnology, Stazione Zoologica Anton Dohrn, Villa Comunale, 80121, Napoli, Italy.

<sup>3</sup> Consiglio Nazionale delle Ricerche, Istituto per le Applicazioni del Calcolo "Mauro Picone", Via Pietro Castellino 111, 80131 - Napoli.

**Fig. S1** GC-MS profile of *N. shiloi* extract with indication of PUAs.

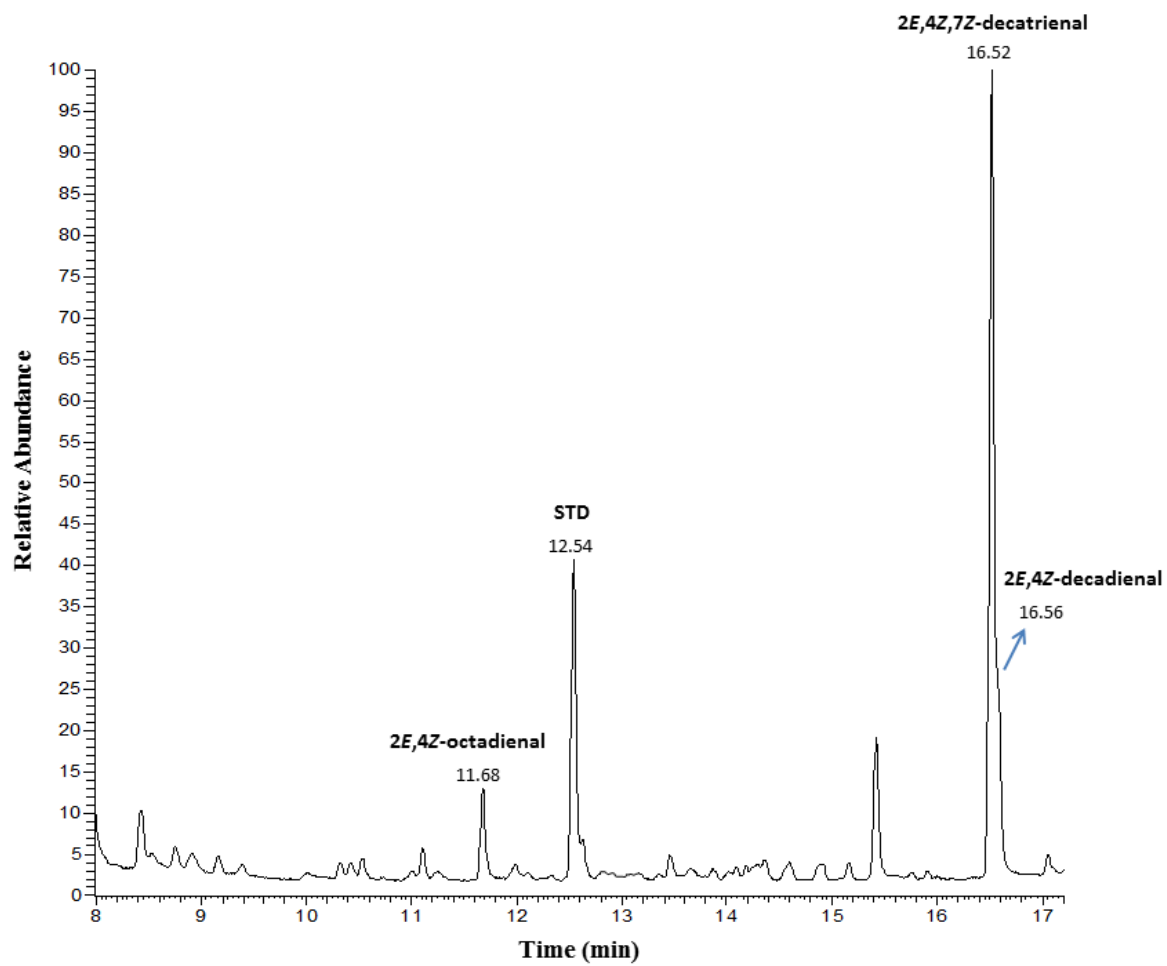

**Fig. S2** Bioassays reported in Ruocco *et al.*, 2018, 2019. **(a)** Percentage of abnormal plutei spawned from sea urchins fed with *U. rigida* (CTRL) and the four benthic diatoms (TREATED); **(b)** Examples of normal and malformed plutei observed in CTRL and TREATED conditions, respectively.

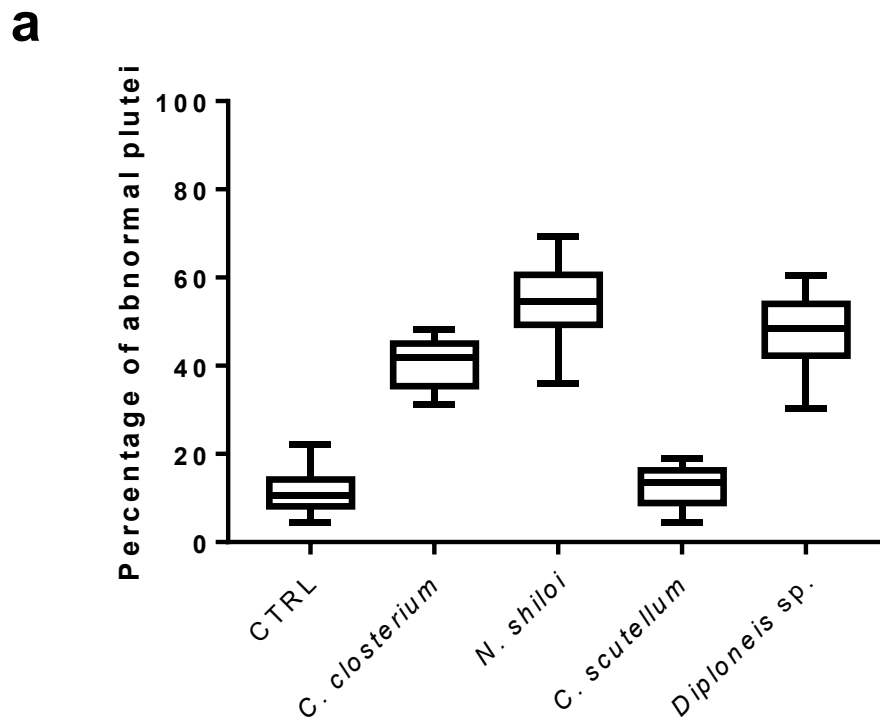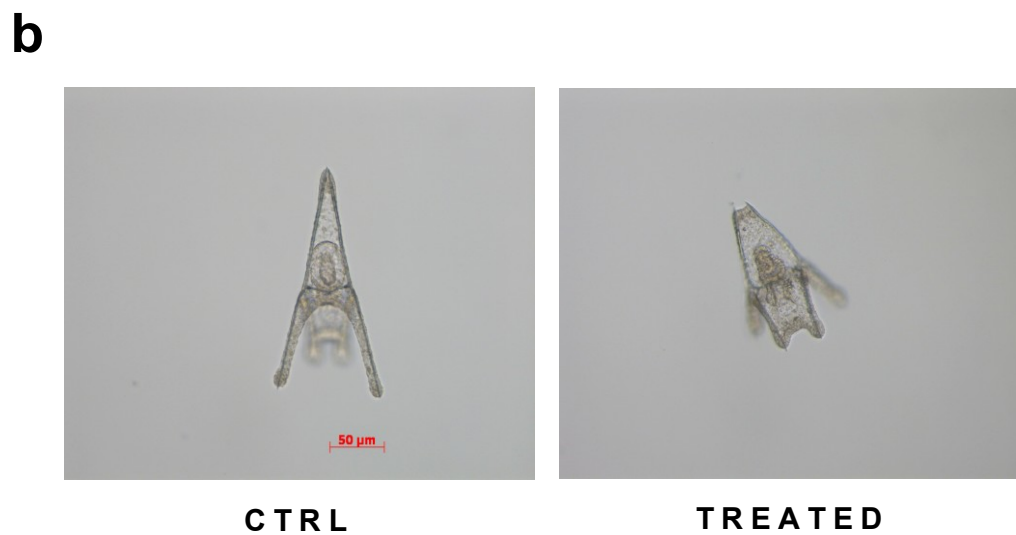

**Fig. S3** Effects on embryos of sea urchin *P. lividus* by feeding experiments with the four benthic diatoms. (a)

Data of plutei survival (n =17) as reported in Ruocco *et al.*, 2018, 2019; (b) Best three fits of plutei survival for the 17 experiments.

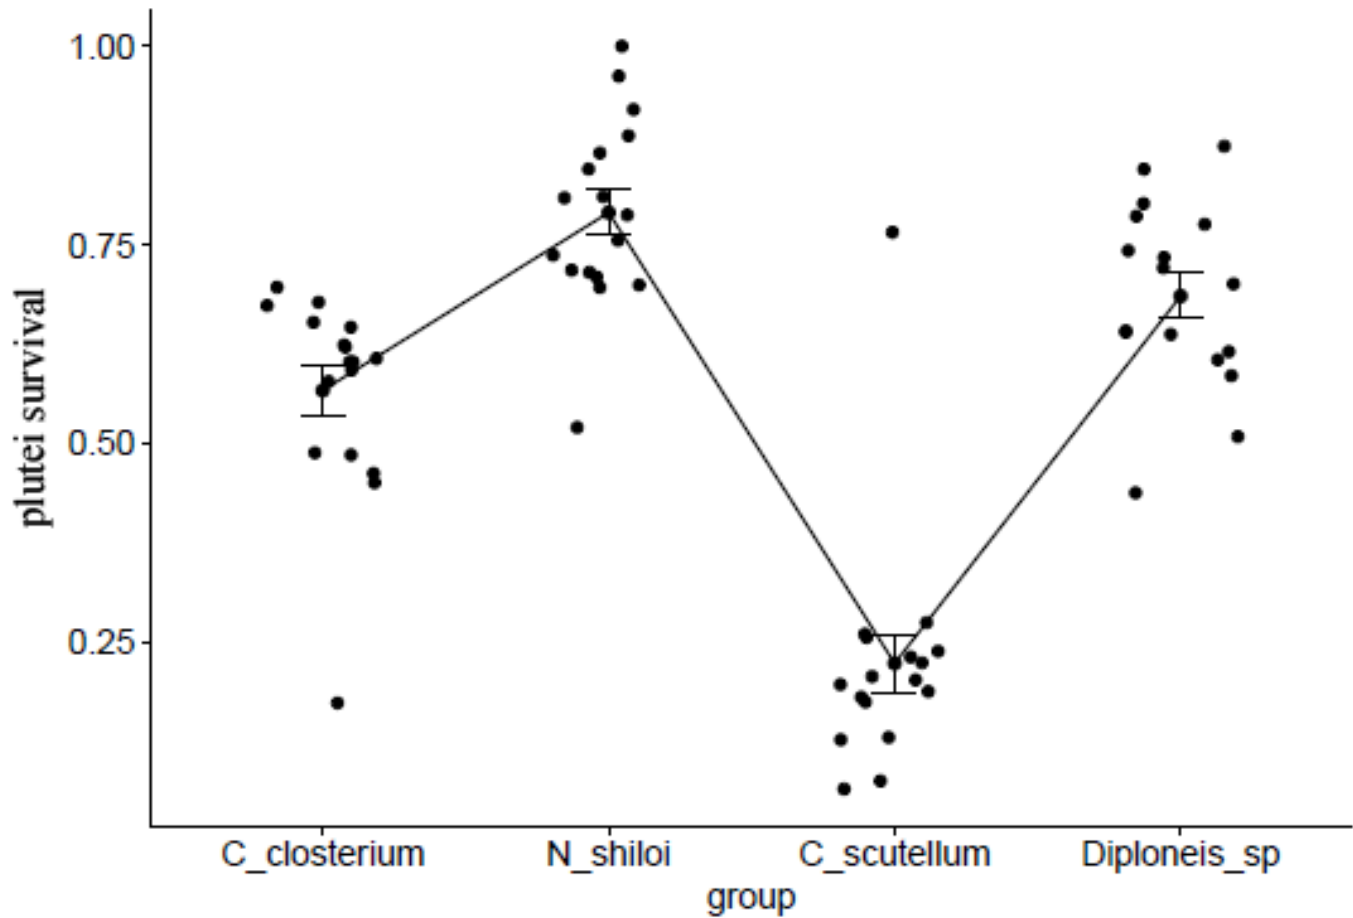

| group        | n  | mean  | sd    | min   | Q1    | median | Q3    | max   | sem    |
|--------------|----|-------|-------|-------|-------|--------|-------|-------|--------|
| C_closterium | 17 | 0.567 | 0.127 | 0.173 | 0.488 | 0.603  | 0.646 | 0.697 | 0.0308 |
| C_scutellum  | 17 | 0.223 | 0.152 | 0.065 | 0.175 | 0.202  | 0.238 | 0.766 | 0.0369 |
| Diploneis_sp | 17 | 0.686 | 0.117 | 0.438 | 0.616 | 0.701  | 0.776 | 0.874 | 0.0284 |
| N_shiloi     | 17 | 0.791 | 0.117 | 0.520 | 0.715 | 0.788  | 0.866 | 1.000 | 0.0284 |

**Table S1** Post-hoc analysis by Multiple Comparisons of Means (Tukey Contrasts) for distribution of oxylipins in the four diatom species.

| group        | n | mean  | sd    | min   | Q1    | median | Q3    | max   | sem      |
|--------------|---|-------|-------|-------|-------|--------|-------|-------|----------|
| C_closterium | 3 | 0.321 | 0.072 | 0.267 | 0.280 | 0.293  | 0.347 | 0.402 | 0.041600 |
| C_scutellum  | 3 | 0.100 | 0.009 | 0.090 | 0.097 | 0.104  | 0.105 | 0.106 | 0.005200 |
| Diploneis_sp | 3 | 0.003 | 0.001 | 0.002 | 0.002 | 0.002  | 0.003 | 0.004 | 0.000577 |
| N_shiloi     | 3 | 0.907 | 0.083 | 0.841 | 0.861 | 0.881  | 0.940 | 1.000 | 0.047900 |

**Table S2** Post-hoc analysis by Multiple Comparisons of Means (Tukey Contrasts) for distribution of FAHs in the four diatom species.

| group        | n | mean  | sd    | min   | Q1    | median | Q3    | max   | sem      |
|--------------|---|-------|-------|-------|-------|--------|-------|-------|----------|
| C_closterium | 3 | 0.284 | 0.042 | 0.237 | 0.267 | 0.297  | 0.307 | 0.317 | 0.024200 |
| C_scutellum  | 3 | 0.199 | 0.008 | 0.190 | 0.195 | 0.200  | 0.203 | 0.206 | 0.004620 |
| Diploneis_sp | 3 | 0.011 | 0.001 | 0.010 | 0.010 | 0.011  | 0.011 | 0.012 | 0.000577 |
| N_shiloi     | 3 | 0.955 | 0.040 | 0.921 | 0.933 | 0.945  | 0.972 | 1.000 | 0.023100 |

**Table S3** Data used for building up of the ternary diagram.

| Species      | rep  | Oxylipins | FAHs      | BioActivity |
|--------------|------|-----------|-----------|-------------|
| C_closterium | rep1 | 0.2929803 | 0.3168820 | 0.6026012   |
| C_closterium | rep2 | 0.4019410 | 0.2372503 | 0.5780347   |
| C_closterium | rep3 | 0.2668113 | 0.2974966 | 0.6213873   |
| N_shiloi     | rep1 | 0.8805875 | 0.9999997 | 0.8092486   |
| N_shiloi     | rep2 | 0.9999957 | 0.9214978 | 0.8453757   |
| N_shiloi     | rep3 | 0.8405334 | 0.9445906 | 0.8656069   |
| C_scutellum  | rep1 | 0.0902770 | 0.1904850 | 0.2239884   |
| C_scutellum  | rep2 | 0.1039217 | 0.2055774 | 0.1878613   |
| C_scutellum  | rep3 | 0.1064433 | 0.2004594 | 0.2312139   |
| Diploneis_sp | rep1 | 0.0020236 | 0.0104364 | 0.5852601   |
| Diploneis_sp | rep2 | 0.0039663 | 0.0122832 | 0.6156069   |
| Diploneis_sp | rep3 | 0.0022260 | 0.0105300 | 0.6401734   |

**Table S4** Oxylipins (LOFAs and PUAs) found in the four diatoms under analysis with indication of the specific enzymatic activity and chemical structures.

| SPECIES                     | ENZYME        | CHEMICAL STRUCTURE |
|-----------------------------|---------------|--------------------|
| <b><i>C. closterium</i></b> |               |                    |
| 14,13-EHETE                 | EPA:15-LOX    |                    |
| 15-HEPE                     | EPA:15-LOX    |                    |
| 16,15-EHDPE                 | DHA:17-LOX    |                    |
| <b><i>N. shiloi</i></b>     |               |                    |
| 9,11-EHHDE                  | HTE:9-LOX     |                    |
| 11,10-EHETE                 | EPA:11-LOX    |                    |
| 11-HEPE                     | EPA:11-LOX    |                    |
| 9-KHME                      | HDE:oxygenase |                    |
| 9-HHME                      | HDE:oxygenase |                    |
| 2E,4Z-octadienal            | HTE:9-LOX     |                    |
| 2E,4Z,7Z-decatrienal        | EPA:11-LOX    |                    |
| 2E,4Z-decadienal            | AA:11-LOX     |                    |
| <b><i>C. scutellum</i></b>  |               |                    |
| 14,13-EHETE                 | EPA:15-LOX    |                    |
| 15-HEPE                     | EPA:15-LOX    |                    |
